# Supplementary material for: Development of a disulfidptosis-related lncRNA signature to prognosticate lung adenocarcinoma
Source: Research Square preprint supplement (doi:10.21203/rs.3.rs-3170587/v1), 2023-07-19
Supplement: Supplementary file 1 [file 8e7a3ed5d6f41cb03ee9bd9c.docx]

**Table S1. Disulfidptosis-related genes**

| **Genes:** |
| --- |
| SLC7A11 |
| SLC3A2 |
| RPN1 |
| NCKAP1 |
| GYS1 |
| OXSM |
| NDUFS1 |
| LRPPRC |
| NDUFA11 |
| NUBPL |
| WASF2 |
| CYFIP1 |
| BRK1 |
| RAC1 |
| SLC2A1 |
| HK1 |
| G6PD |
| PGD |
