# Supplementary material for: Development of a disulfidptosis-related lncRNA signature to prognosticate lung adenocarcinoma
Source: Research Square preprint supplement (doi:10.21203/rs.3.rs-3170587/v1), 2023-07-19
Supplement: Supplementary file 2 [file bb86aca8bd06bedbf77b8f3b.docx]

**Table S4. Clinical characteristics of two cohorts**

| **Covariates** | **Type** | **Total** | **Test** | **Train** | **Pvalue** |
| --- | --- | --- | --- | --- | --- |
| **Age** | <=65 | 239(47.14%) | 126(49.8%) | 113(44.49%) | 0.1677 |
|  | >65 | 258(50.89%) | 119(47.04%) | 139(54.72%) |  |
|  | unknow | 10(1.97%) | 8(3.16%) | 2(0.79%) |  |
| **T** | T1 | 169(33.33%) | 90(35.57%) | 79(31.1%) | 0.1368 |
|  | T2 | 271(53.45%) | 136(53.75%) | 135(53.15%) |  |
|  | T3 | 45(8.88%) | 20(7.91%) | 25(9.84%) |  |
|  | T4 | 19(3.75%) | 5(1.98%) | 14(5.51%) |  |
|  | unknow | 3(0.59%) | 2(0.79%) | 1(0.39%) |  |
| **M** | M0 | 338(66.67%) | 164(64.82%) | 174(68.5%) | 1 |
|  | M1 | 25(4.93%) | 12(4.74%) | 13(5.12%) |  |
|  | unknow | 144(28.4%) | 77(30.43%) | 67(26.38%) |  |
| **N** | N0 | 327(64.5%) | 167(66.01%) | 160(62.99%) | 0.7208 |
|  | N1 | 95(18.74%) | 46(18.18%) | 49(19.29%) |  |
|  | N2 | 71(14%) | 31(12.25%) | 40(15.75%) |  |
|  | N3 | 2(0.39%) | 1(0.4%) | 1(0.39%) |  |
|  | unknow | 12(2.37%) | 8(3.16%) | 4(1.57%) |  |
| **Gender** | FEMALE | 272(53.65%) | 134(52.96%) | 138(54.33%) | 0.8263 |
|  | MALE | 235(46.35%) | 119(47.04%) | 116(45.67%) |  |
| **Stage** | Stage I | 272(53.65%) | 145(57.31%) | 127(50%) | 0.2847 |
|  | Stage II | 120(23.67%) | 56(22.13%) | 64(25.2%) |  |
|  | Stage III | 81(15.98%) | 34(13.44%) | 47(18.5%) |  |
|  | Stage IV | 26(5.13%) | 13(5.14%) | 13(5.12%) |  |
|  | unknow | 8(1.58%) | 5(1.98%) | 3(1.18%) |  |
