# Supplementary material for: Development of a disulfidptosis-related lncRNA signature to prognosticate lung adenocarcinoma
Source: Research Square preprint supplement (doi:10.21203/rs.3.rs-3170587/v1), 2023-07-19
Supplement: Supplementary file 3 [file f880b8eb7d61d745f4fe3f7e.docx]

**Table S2. The primers sequences for qRT-PCR analyses.**

|  | **Forward** **primer (5’-3’)** | **Reverse primer (5’-3’)** |
| --- | --- | --- |
| SLC7A11 | TGTGTGGGGTCCTGTCACTA | CAGTAGCTGCAGGGCGTATT |
| SLC3A2 | TGAATGAGTTAGAGCCCGAGA | GTCTTCCGCCACCTTGATCTT |
| GYS1 | CAAGGGCTGCAAGTTCCTGG | ATGGTTGCTACAGGCAGTCG |
| RAC1 | AAACCGGTGAATCTGGGCTT | AGAACACATCTGTTTGCGGA |
| SLC2A1 | TCTCGAAACTGGGCAAGTCC | TCACCCACATACATGGGCAC |
| LINC02323 | TTTGTCCAGGACGTTCCCTC | CCGGTCCCGGATTTAAGCAG |
| AC012615.1 | GGACTCCGCCGTGTCTTCATTG | ACCAAATACCCTTTCAGGCTCCTTG |
| AC092718.4 | GGTGTGCACCTGTAATCCCA | GGATGCAGTGGTCATCGCA |
| AL606489.1 | CTAAGAACTCAGGAAAGACATCAGC | CATGGGACTGAAAGGGCAAAG |
| GAPDH | TCTGGAAAGCTGTGGCGTGA | AGCTCTGGGATGACCTTGCC |
