# Supplementary material for: Development of a disulfidptosis-related lncRNA signature to prognosticate lung adenocarcinoma
Source: Research Square preprint supplement (doi:10.21203/rs.3.rs-3170587/v1), 2023-07-19
Supplement: Supplementary file 4 [file fb46fa192977a867eb8f268e.docx]

**Table S3. Identified DRLs using Pearson correlation analysis**

| **Disulfidptosis genes** | **lncRNAs** | **cor** | ***P*-value** | **Regulation** |
| --- | --- | --- | --- | --- |
| LRPPRC | ALMS1-IT1 | 0.411963514 | 1.41E-23 | postive |
| G6PD | AC106045.1 | 0.41183503 | 1.46E-23 | postive |
| PGD | AC106045.1 | 0.424840401 | 4.05E-25 | postive |
| PGD | AC026785.3 | 0.464632682 | 2.52E-30 | postive |
| RPN1 | AC104472.4 | 0.412856384 | 1.11E-23 | postive |
| WASF2 | AL450326.1 | 0.41770534 | 2.95E-24 | postive |
| CYFIP1 | AL450326.1 | 0.458201037 | 1.95E-29 | postive |
| HK1 | AL450326.1 | 0.428858057 | 1.29E-25 | postive |
| OXSM | ENTPD3-AS1 | 0.464398181 | 2.72E-30 | postive |
| LRPPRC | AC012073.1 | 0.512955966 | 1.22E-37 | postive |
| NCKAP1 | OIP5-AS1 | 0.459182963 | 1.43E-29 | postive |
| NDUFS1 | OIP5-AS1 | 0.450656845 | 2.04E-28 | postive |
| NDUFA11 | LMNTD2-AS1 | 0.41173916 | 1.50E-23 | postive |
| RPN1 | STK4-AS1 | 0.428871434 | 1.29E-25 | postive |
| NDUFA11 | MHENCR | 0.474773161 | 9.16E-32 | postive |
| NDUFA11 | KMT2E-AS1 | 0.550660544 | 3.21E-44 | postive |
| LRPPRC | AC003086.1 | 0.421786687 | 9.52E-25 | postive |
| NDUFA11 | LINC01023 | 0.420205258 | 1.48E-24 | postive |
| NDUFA11 | LINC01089 | 0.482770001 | 6.19E-33 | postive |
| NCKAP1 | AL606834.1 | 0.414672741 | 6.76E-24 | postive |
| G6PD | AC092115.3 | 0.415560092 | 5.31E-24 | postive |
| PGD | AC092115.3 | 0.432495024 | 4.55E-26 | postive |
| NDUFA11 | PP7080 | 0.428468656 | 1.45E-25 | postive |
| NDUFA11 | AL928654.2 | 0.410295182 | 2.21E-23 | postive |
| NDUFA11 | ARRDC1-AS1 | 0.463928015 | 3.16E-30 | postive |
| LRPPRC | AC091057.1 | 0.438791275 | 7.24E-27 | postive |
| LRPPRC | LYRM4-AS1 | 0.461686497 | 6.47E-30 | postive |
| WASF2 | LYRM4-AS1 | 0.40863135 | 3.45E-23 | postive |
| NDUFA11 | AC087289.2 | 0.48790871 | 1.06E-33 | postive |
| G6PD | AC090772.3 | 0.400623231 | 2.84E-22 | postive |
| PGD | AC090772.3 | 0.442963827 | 2.10E-27 | postive |
| NDUFA11 | PTOV1-AS2 | 0.509131478 | 5.12E-37 | postive |
| PGD | AL391427.1 | 0.466696714 | 1.30E-30 | postive |
| NDUFA11 | AC084125.2 | 0.422199041 | 8.49E-25 | postive |
| NDUFA11 | AC011462.4 | 0.41035127 | 2.18E-23 | postive |
| NDUFA11 | AC074212.1 | 0.435887289 | 1.70E-26 | postive |
| NDUFS1 | MIR4713HG | 0.407611576 | 4.52E-23 | postive |
| RAC1 | RNF216P1 | 0.438455389 | 8.00E-27 | postive |
| PGD | AP000688.1 | 0.415088034 | 6.04E-24 | postive |
| NCKAP1 | FGD5-AS1 | 0.425559704 | 3.30E-25 | postive |
| BRK1 | FGD5-AS1 | 0.482876301 | 5.97E-33 | postive |
| WASF2 | LINC01128 | 0.421925803 | 9.16E-25 | postive |
| NDUFA11 | TMEM147-AS1 | 0.409489324 | 2.74E-23 | postive |
| NDUFA11 | AC114730.3 | 0.419300625 | 1.90E-24 | postive |
| NDUFA11 | AC015912.3 | 0.442017616 | 2.78E-27 | postive |
| NDUFA11 | C9orf163 | 0.453916503 | 7.44E-29 | postive |
| WASF2 | AL513165.1 | 0.426893228 | 2.27E-25 | postive |
| NDUFA11 | CACTIN-AS1 | 0.439571619 | 5.75E-27 | postive |
| WASF2 | SMARCA5-AS1 | 0.447966495 | 4.63E-28 | postive |
| G6PD | AL033397.1 | 0.608184476 | 4.94E-56 | postive |
| PGD | AL033397.1 | 0.463860514 | 3.23E-30 | postive |
| NDUFA11 | AC008764.6 | 0.491347077 | 3.18E-34 | postive |
| PGD | DLGAP1-AS1 | 0.457575379 | 2.37E-29 | postive |
| NDUFA11 | AP006621.4 | 0.404952515 | 9.14E-23 | postive |
| SLC3A2 | AC092718.4 | 0.425619519 | 3.25E-25 | postive |
| NDUFA11 | AC133552.5 | 0.403344381 | 1.39E-22 | postive |
| LRPPRC | RNASEH1-AS1 | 0.433145327 | 3.77E-26 | postive |
| SLC2A1 | AC079949.2 | 0.402671674 | 1.66E-22 | postive |
| GYS1 | LINC01960 | 0.401491125 | 2.26E-22 | postive |
| LRPPRC | EMSLR | 0.408424079 | 3.64E-23 | postive |
| SLC2A1 | AP000695.2 | 0.44984633 | 2.61E-28 | postive |
| NCKAP1 | AC015922.2 | 0.403559827 | 1.32E-22 | postive |
| NDUFS1 | AC015922.2 | 0.418014808 | 2.71E-24 | postive |
| LRPPRC | KTN1-AS1 | 0.477787766 | 3.34E-32 | postive |
| NDUFA11 | AC020558.2 | 0.40452698 | 1.02E-22 | postive |
| NDUFA11 | AC012615.1 | 0.525492418 | 9.77E-40 | postive |
| G6PD | AP003119.1 | 0.484876722 | 3.01E-33 | postive |
| PGD | AP003119.1 | 0.477201569 | 4.07E-32 | postive |
| NCKAP1 | USP46-DT | 0.440390877 | 4.51E-27 | postive |
| NDUFA11 | AL355353.1 | 0.408901047 | 3.21E-23 | postive |
| G6PD | AC243965.2 | 0.434070825 | 2.89E-26 | postive |
| NDUFA11 | LINC01311 | 0.464236298 | 2.86E-30 | postive |
| NUBPL | AL132800.1 | 0.475908795 | 6.27E-32 | postive |
| RPN1 | LINC01063 | 0.448781812 | 3.61E-28 | postive |
| NDUFA11 | AC087741.1 | 0.411955198 | 1.41E-23 | postive |
| G6PD | AC009275.1 | 0.452410197 | 1.19E-28 | postive |
| SLC2A1 | LINC02323 | 0.415997427 | 4.71E-24 | postive |
| NCKAP1 | AC021037.1 | 0.446491347 | 7.25E-28 | postive |
| NDUFA11 | AP001412.1 | 0.45967052 | 1.23E-29 | postive |
| NUBPL | AL139353.2 | 0.459008534 | 1.51E-29 | postive |
| NCKAP1 | STARD7-AS1 | 0.405011912 | 9.00E-23 | postive |
| LRPPRC | SNHG16 | 0.536604067 | 1.14E-41 | postive |
| NDUFA11 | AC005387.1 | 0.533109442 | 4.71E-41 | postive |
| G6PD | LINC01484 | 0.504785766 | 2.55E-36 | postive |
| NDUFA11 | AC116407.2 | 0.407050399 | 5.25E-23 | postive |
| NUBPL | AC011815.1 | 0.486557921 | 1.69E-33 | postive |
| LRPPRC | AC234917.3 | 0.458368475 | 1.85E-29 | postive |
| PGD | AC145207.8 | 0.453615951 | 8.17E-29 | postive |
| NDUFA11 | AL513320.1 | 0.475215997 | 7.90E-32 | postive |
| NDUFA11 | NALT1 | 0.425554162 | 3.31E-25 | postive |
| SLC7A11 | AL365181.3 | 0.48665534 | 1.63E-33 | postive |
| G6PD | AL365181.3 | 0.511377379 | 2.21E-37 | postive |
| PGD | AL365181.3 | 0.460624381 | 9.07E-30 | postive |
| RAC1 | ZFAND2A-DT | 0.450446936 | 2.17E-28 | postive |
| NCKAP1 | NORAD | 0.504122404 | 3.25E-36 | postive |
| NUBPL | AC004943.2 | 0.417597438 | 3.04E-24 | postive |
| OXSM | GAS5 | 0.462994761 | 4.26E-30 | postive |
| NDUFA11 | AL136295.2 | 0.434843443 | 2.30E-26 | postive |
| NDUFA11 | AC008608.2 | 0.455254985 | 4.91E-29 | postive |
| SLC2A1 | SLC2A1-AS1 | 0.496875367 | 4.48E-35 | postive |
| PGD | AL139424.2 | 0.427698598 | 1.80E-25 | postive |
| G6PD | LINC00942 | 0.485227689 | 2.67E-33 | postive |
| PGD | LINC00942 | 0.4612423 | 7.45E-30 | postive |
| NDUFA11 | AC132872.2 | 0.467459171 | 1.01E-30 | postive |
| G6PD | AC114489.1 | 0.462740639 | 4.62E-30 | postive |
| PGD | AC114489.1 | 0.456034479 | 3.85E-29 | postive |
| WASF2 | AC125807.2 | 0.492771506 | 1.92E-34 | postive |
| NDUFA11 | SNHG12 | 0.492350708 | 2.23E-34 | postive |
| NDUFA11 | SNHG10 | 0.41122497 | 1.72E-23 | postive |
| NCKAP1 | AC112220.2 | 0.426614526 | 2.45E-25 | postive |
| NDUFA11 | SNHG11 | 0.407389531 | 4.80E-23 | postive |
| NDUFA11 | AC016773.1 | 0.450647002 | 2.04E-28 | postive |
| NDUFA11 | AL033527.2 | 0.434500029 | 2.55E-26 | postive |
| SLC7A11 | LINP1 | 0.440142391 | 4.86E-27 | postive |
| PGD | LINP1 | 0.405264558 | 8.42E-23 | postive |
| NDUFA11 | AL390719.2 | 0.464652497 | 2.50E-30 | postive |
| NDUFA11 | CAHM | 0.448665946 | 3.74E-28 | postive |
| SLC7A11 | AL590666.2 | 0.447474266 | 5.38E-28 | postive |
| NDUFS1 | AL590666.2 | 0.401464355 | 2.28E-22 | postive |
| G6PD | AL590666.2 | 0.523834589 | 1.87E-39 | postive |
| PGD | AL590666.2 | 0.455695652 | 4.28E-29 | postive |
| NDUFA11 | AC027601.1 | 0.484890643 | 2.99E-33 | postive |
| NDUFA11 | AC092171.4 | 0.420101796 | 1.52E-24 | postive |
| WASF2 | LINC01963 | 0.404894297 | 9.28E-23 | postive |
| NDUFA11 | AC009065.4 | 0.508233158 | 7.14E-37 | postive |
| SLC7A11 | LINC01269 | 0.435237828 | 2.05E-26 | postive |
| G6PD | LINC01269 | 0.4431375 | 1.99E-27 | postive |
| NDUFA11 | AC011498.6 | 0.42719621 | 2.08E-25 | postive |
| NDUFA11 | MIR762HG | 0.418730063 | 2.22E-24 | postive |
| RPN1 | AC137695.3 | 0.497665265 | 3.38E-35 | postive |
| SLC3A2 | AP003119.2 | 0.415104325 | 6.01E-24 | postive |
| G6PD | AP003119.2 | 0.447887411 | 4.74E-28 | postive |
| NCKAP1 | AL606489.1 | 0.423636156 | 5.68E-25 | postive |
| SLC7A11 | AL365181.2 | 0.414244938 | 7.60E-24 | postive |
| G6PD | AL365181.2 | 0.4802753 | 1.45E-32 | postive |
| PGD | AL365181.2 | 0.434710442 | 2.40E-26 | postive |
| SLC2A1 | LINC02178 | 0.43839634 | 8.14E-27 | postive |
| NDUFA11 | AC010331.1 | 0.407666431 | 4.46E-23 | postive |
| NDUFA11 | AP003419.3 | 0.404448531 | 1.04E-22 | postive |
| NDUFA11 | AC008760.1 | 0.416454401 | 4.16E-24 | postive |
